# Supplementary material
Source: Springer Nature journal article supplement (https://www.springermedizin.de/resource/supplementary/12872_2003_32_MOESM1_ESM.pdf/9430870)
Supplement: MOESM1 [file 9430870]

Identified in hospital

Referral from surgical centre to participating hospitals

MI / PTCA

CABG

Agree to randomisation

Collection of baseline data - Randomisation stratified by sex, ethnicity, diagnosis & hospital

**Hospital rehabilitation programme:**

Supervised exercise, relaxation, risk factor assessment and life-style counselling

**Home rehabilitation programme:**

The Heart Manual with home visits at 10 days, 6 weeks and 12 weeks, plus telephone support.

Hand over to primary care team or phase IV rehabilitation

Follow-up at 6, 12 & 24 months for clinical endpoints
